# Supplementary material for: Polysaccharide-assisted rapid exfoliation of graphite platelets into high quality water-dispersible graphene sheets
Source: Royal Society of Chemistry journal article supplement (doi:10.1039/c4ra16947f), 2015-01-01
Supplement: c4ra16947f1.pdf [file c4ra16947f1.pdf]

# Polysaccharide-assisted rapid exfoliation of graphite platelets into high quality water-dispersible graphene sheets

Ilke Uysal Unalan, Chaoying Wan, Silvia Trabattoni, Luciano Piergiovanni, Stefano Farris\*

## Supporting Information

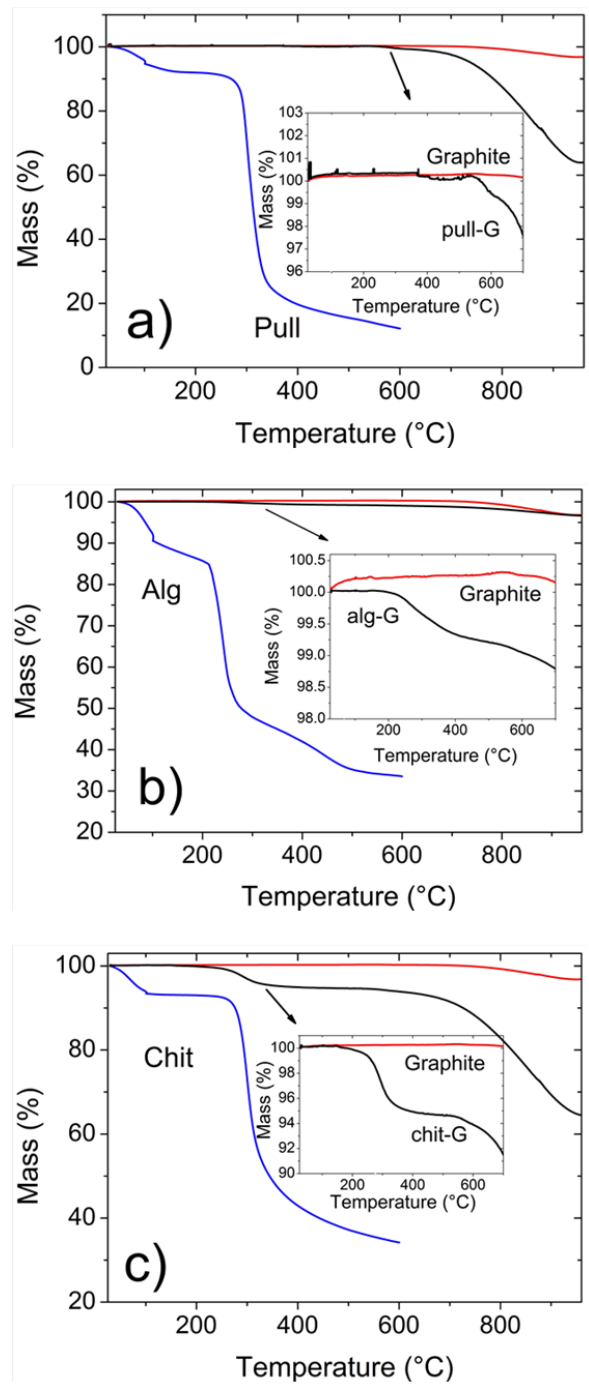

**Figure S1.** TGA traces of graphite (red lines), pullulan, alginate, chitosan (blue lines) and pull-G, alg-G and chit-G (black lines) exposed to a N<sub>2</sub> atmosphere. The inset in each panel is a zoomed view of the traces within the 0–700 °C range.

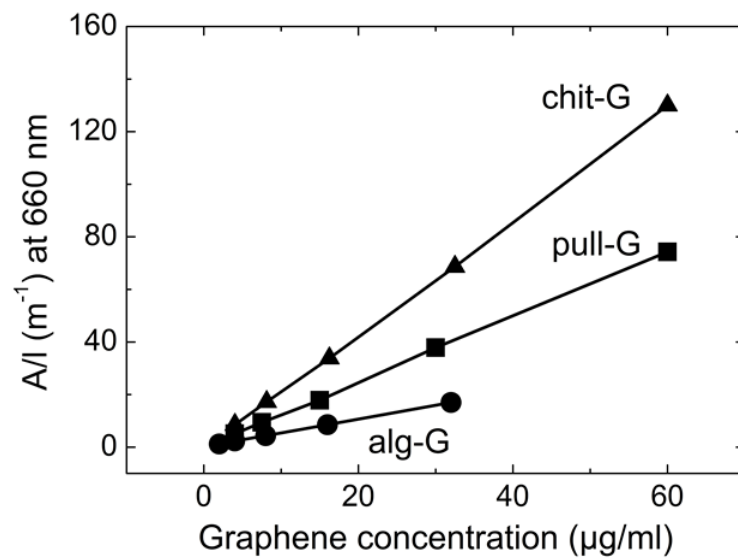

**Figure S2.** Absorbance unit values for different concentrations of pull-G (●), chit-G (■), and alg-G (⊗) water dispersions
